# Supplementary material
Source: HighWire-hosted journal article supplement (https://bmjopen.bmj.com/content/11/10/e049135)
Supplement: inline-supplementary-material-2 [file inline-supplementary-material-2.pdf]

## Supplementary file 2.

Table 1. Factors influencing to be professional prepared for working in COVID-ICUs. Backward logistic regression.

| Variables                                                         | Unadjusted model univariate |      |      |       |                | Step 1 |       |      |       |                | Step 6 final model |      |      |       |                 |
|-------------------------------------------------------------------|-----------------------------|------|------|-------|----------------|--------|-------|------|-------|----------------|--------------------|------|------|-------|-----------------|
|                                                                   | B                           | SE   | p    | OR    | 95% CI         | B      | SE    | p    | OR    | 95% CI         | B                  | SE   | P    | OR    | 95 % CI         |
| Sex <sup>†</sup>                                                  |                             |      |      |       |                |        |       |      |       |                |                    |      |      |       |                 |
| Female (1)                                                        | .123                        | .284 | .665 | 1.131 | [.648, 1.975]  | .095   | .340  | .779 | 1.100 | [.565, 2.141]  | .195               | .308 | .536 | 1.216 | [.665, 2.224]   |
| Age <sup>†</sup>                                                  | .024                        | .012 | .046 | 1.024 | [1.000,1.049]  | .011   | .034  | .749 | 1.011 | [.945, 1.082]  | .018               | .013 | .168 | 1.018 | [.993, 1.044]   |
| Marital status                                                    |                             |      |      |       |                |        |       |      |       |                |                    |      |      |       |                 |
| Married/partner (1)                                               |                             |      |      |       |                |        |       |      |       |                |                    |      |      |       |                 |
| No. people in household                                           |                             |      |      |       |                |        |       |      |       |                |                    |      |      |       |                 |
| One (1)                                                           | .318                        | .268 | .237 | 1.374 | [.812, 2.324]  | -.123  | .447  | .783 | .884  | [.368, 2.124]  |                    |      |      |       |                 |
| Personal risk factors                                             |                             |      |      |       |                |        |       |      |       |                |                    |      |      |       |                 |
| developing serious COVID-19, Yes (1)                              | -.167                       | .327 | .610 | .846  | [.446, 1.605]  | -.147  | .395  | .710 | .863  | [.398, 1.872]  |                    |      |      |       |                 |
| Profession* Nurse (1)                                             | -.583                       | .452 | .197 | .558  | [.230, 1.354]  | -.450  | .502  | .370 | .638  | [.238, 1.707]  |                    |      |      |       |                 |
| Years of professional experience nurses and medical doctors       | .029                        | .014 | .034 | 1.029 | [1.002, 1.057] | .016   | .036  | .650 | 1.017 | [.947, 1.091]  |                    |      |      |       |                 |
| ICU work Experience                                               |                             |      |      |       |                |        |       |      |       |                |                    |      |      |       |                 |
| Yes (1)                                                           | 1.626                       | .341 | .000 | 5.082 | [2.604, 9.919] | 1.426  | .428  | .001 | 4.163 | [1.798, 9.638] | 1.652              | .369 | .000 | 5.217 | [2.533, 10.746] |
| Previous experience COVID-ICU like tasks                          |                             |      |      |       |                |        |       |      |       |                |                    |      |      |       |                 |
| Yes (1)                                                           | .789                        | .264 | .003 | 2.201 | [1.311, 3.694] | .228   | .342  | .505 | 1.256 | [.642, 2.456]  |                    |      |      |       |                 |
| Simulation training similar to treatment team COVID-ICU patients, |                             |      |      |       |                |        |       |      |       |                |                    |      |      |       |                 |
| Yes (1)                                                           | 1.228                       | .272 | .000 | 3.415 | [2.004, 5.819] | 1.196  | .300  | .000 | 3.307 | [1.838, 5.949] | 1.239              | .283 | .000 | 3.451 | [1.980, 6.013]  |
| Date start-up working COVID-ICU (ref. 23. March or later)         |                             |      |      |       |                |        |       |      |       |                |                    |      |      |       |                 |
|                                                                   |                             |      | .031 |       |                |        |       |      |       |                |                    |      |      |       |                 |
| 17 - 23.2                                                         | .182                        | .560 | .745 | 1.199 | [.400, 3.597]  | .027   | .712  | .969 | 1.028 | [.255, 4.147]  | -.236              | .655 | .719 | .790  | [.219, 2.853]   |
| 24.2 - 1.3                                                        | .071                        | .565 | .900 | 1.074 | [.355, 3.251]  | -.507  | .653  | .438 | .602  | [.167, 2.167]  | -.487              | .640 | .447 | .614  | [.175, 2.155]   |
| 2.3 - 8.3                                                         | -.016                       | .438 | .971 | .984  | [.417, 2.322]  | -.579  | .585  | .323 | .561  | [.178, 1.764]  | -.681              | .547 | .213 | .506  | [.173, 1.479]   |
| 9.3 - 15.3                                                        | -.053                       | .264 | .842 | .949  | [.565, 1.592]  | -.733  | .395  | .063 | .480  | [.222, 1.041]  | -.783              | .370 | .034 | .457  | [.221, .944]    |
| 16.3 - 22.3                                                       | -.517                       | .241 | .032 | .597  | [.372, .957]   | -.888  | .357  | .013 | .411  | [.205, .828]   | -.982              | .344 | .004 | .375  | [.191, .735]    |
| Constant                                                          |                             |      |      |       |                | -.238  | 1.184 | .841 | .789  |                | -.544              | .676 | .422 | .581  |                 |

CI = confidence interval for odds ratio (OR) , \*Significant factors p&lt;.05

<sup>†</sup> Age and gender, forced in the model at all steps.

Age; 1=Women 0=Men, Marital status; 1=Married or partner 0=Not married or partner, No. of people in household; 1=1 0=two or more, Personal risk factor of developing serious COVID-19; 0=No, 1=Yes, ICU work Experience; 0=No 1=Yes, Previous experience COVID-ICU like tasks; 0=No 1=Yes, Simulation training similar to treatment team COVID-ICU patients; 0=No 1=Yes.

Hosmer and Lemeshow test; p=. **step1:** .369 **step6:** .148
